# Supplementary material for: Phase behavior of a binary lipid system containing long- and short-chain phosphatidylcholines
Source: Royal Society of Chemistry journal article supplement (doi:10.1039/c6ra24961b), 2017-01-01
Supplement: c6ra24961b1.pdf [file c6ra24961b1.pdf]

**Electronic supplementary information for:**

**Phase behaviors of a binary lipid system containing long- and short-  
chain phosphatidylcholines †**

Hai-Yuan Sun,<sup>a</sup> Fu-Gen Wu,<sup>b</sup> Zhi-Hong Li,<sup>c</sup> Yu Zhou,<sup>a</sup> Geng Deng,<sup>a</sup> and Zhi-Wu

Yu<sup>\*a</sup>

<sup>a</sup>*Key Laboratory of Bioorganic Phosphorous Chemistry and Chemical Biology (Ministry of Education), Department of Chemistry, Tsinghua University, Beijing 100084, P. R. China*

<sup>b</sup>*State Key Laboratory of Bioelectronics, School of Biological Science and Medical Engineering, Southeast University, Nanjing 210096, P. R. China*

<sup>c</sup>*Beijing Synchrotron Radiation Facility, Institute of High Energy Physics, Chinese Academy of Sciences, Beijing 100049, P. R. China*

**\*Corresponding Authors**

\*Zhi-Wu Yu, E-mail: yuzhw@tsinghua.edu.cn.

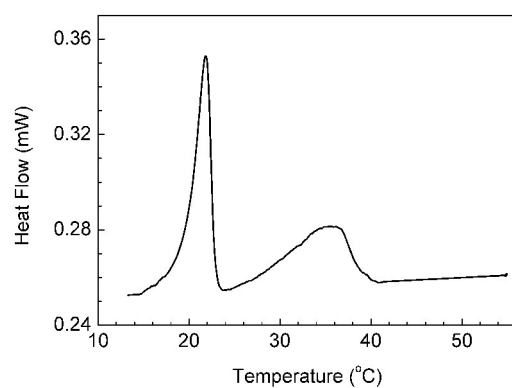

**Fig. S1** DSC heating result of DPPC–diC8PC binary lipid mixture ( $q = 1$ ) after treated with the same procedure as in the *in-situ* SAXS experiment. The peak around 20 °C indicates the formation of the  $L_c'$  phase.
